# Supplementary material for: Musculoskeletal pain is common in competitive gaming: a cross-sectional study among Danish esports athletes
Source: PubMed Central journal article supplement (PMC7876625; doi:10.1136/bmjsem-2020-000799), 2020-08-28
Supplement: bmjsem-2020-000799supp001.pdf [file bmjsem-2020-000799supp001.pdf]

---

**Supplementary S1 Pain distribution and frequency**

---

**Variables** **Any MSK pain during previous week (n=80)****Pain sites, n (%)**

|                |            |
|----------------|------------|
| - Back         | 25 (31.3%) |
| - Neck         | 9 (11.3%)  |
| - Shoulder     | 9 (11.3%)  |
| - Head         | 7 (8.8%)   |
| - Forarm       | 6 (7.5%)   |
| - Wrist        | 5 (6.3%)   |
| - Hand/fingers | 4 (5.0%)   |
| - Knee         | 4 (5.0%)   |
| - Thigh        | 3 (3.8%)   |
| - Ankle        | 3 (3.8%)   |
| - Shinbone     | 1 (1.3%)   |
| - Upperarm     | 1 (1.3%)   |
| - Chest        | 1 (1.3%)   |
| - Hip/groin    | 1 (1.3%)   |
| - Foot/toes    | 1 (1.3%)   |
| - Stomach      | 0 (0%)     |
| - Elbow        | 0 (0%)     |

**Pain frequency**

|                          |             |
|--------------------------|-------------|
| - Daily                  | 23 (28.75%) |
| - Several times per week | 11 (13.75%) |
| - Weekly                 | 22 (27.5%)  |
| - Monthly                | 14 (17.5%)  |
| -Seldom                  | 10 (12.5%)  |

---
